# Supplementary material for: AI-assisted Total Body Dermoscopic Evaluation of Changes in Melanocytic Nevi during Pregnancy: A Prospective, Comparative Study of 2,799 Nevi
Source: PubMed Central journal article supplement — Acta Derm Venereol. 2025 Jan 3;105:41025. doi: 10.2340/actadv.v105.41025 (PMC11697141; doi:10.2340/actadv.v105.41025), 2025-01-03
Supplement: ActaDV-105-41025-s2.pdf [file ActaDV-105-41025-s2.pdf]

Supplementary material has been published as submitted. It has not been copyedited, or typeset by Acta Dermato-Venereologica

**Table SI. Additional data on patient characteristics of non-pregnant and pregnant women**

| Characteristic           | Overall,<br>N = 50 <sup>a</sup> | Non-pregnant,<br>N = 25 <sup>a</sup> | Pregnant,<br>N = 25 <sup>a</sup>                   |
|--------------------------|---------------------------------|--------------------------------------|----------------------------------------------------|
| Previous other cancer    |                                 |                                      |                                                    |
| No                       | 49 (100%)                       | 25 (100%)                            | 24 (94%)                                           |
| Yes                      | 0 (0%)                          | 0 (0%)                               | 1 (4%)                                             |
| Previous pregnancy       |                                 |                                      |                                                    |
| No                       | 36 (72%)                        | 23 (92%)                             | 13 (52%)                                           |
| Yes                      | 14 (28%)                        | 2 (8.0%)                             | 12 (48%)                                           |
| Previous birth           |                                 |                                      |                                                    |
| No                       | 42 (84%)                        | 23 (92%)                             | 19 (76%)                                           |
| Yes                      | 8 (16%)                         | 2 (8.0%)                             | 6 (24%)                                            |
| Nicotine                 |                                 |                                      |                                                    |
| No                       | 40 (80%)                        | 21 (84%)                             | 19 (76%)                                           |
| Yes                      | 10 (20%)                        | 4 (16%)                              | 6 (24%)<br>(all 6 with cessation during pregnancy) |
| Alcohol consumption      |                                 |                                      |                                                    |
| Never                    | 4 (8.0%)                        | 2 (8.0%)                             | 2 (8.0%)                                           |
| Occasionally             | 46 (92%)                        | 23 (92%)                             | 23 (92%)                                           |
| Education                |                                 |                                      |                                                    |
| Apprenticeship           | 5 (10%)                         | 1 (4.0%)                             | 4 (16%)                                            |
| HF                       | 7 (14%)                         | 2 (8.0%)                             | 5 (20%)                                            |
| Uni/FH                   | 38 (76%)                        | 22 (88%)                             | 16 (64%)                                           |
| Dermatological disease   |                                 |                                      |                                                    |
| No                       | 44 (88%)                        | 23 (92%)                             | 21 (84%)                                           |
| Atopy                    | 4 (8.0%)                        | 2 (8.0%)                             | 2 (8.0%)                                           |
| PLEVA                    | 1 (2.0%)                        | 0 (0%)                               | 1 (4.0%)                                           |
| Scleroderma              | 1 (2.0%)                        | 0 (0%)                               | 1 (4.0%)                                           |
| Check-up in last 2 years |                                 |                                      |                                                    |
| No                       | 39 (78%)                        | 21 (84%)                             | 18 (72%)                                           |
| Yes                      | 11 (22%)                        | 4 (16%)                              | 7 (28%)                                            |
| <sup>a</sup> n (%)       |                                 |                                      |                                                    |

**Table SII. Total number of nevi on different localizations**

| <b>Localization</b> | <b>Overall,<br/>Total MN: 2799<sup>a</sup></b> | <b>Non-pregnant,<br/>Total MN: 1422<sup>a</sup></b> | <b>Pregnant,<br/>Total MN: 1377<sup>a</sup></b> |
|---------------------|------------------------------------------------|-----------------------------------------------------|-------------------------------------------------|
| Abdomen             | 4.5 (3.9) [1; 16]<br>189<br>42                 | 3.4 (2.8) [1; 13]<br>75<br>22                       | 5.7 (4.6) [1; 16]<br>114<br>20                  |
| Back                | 11.7 (11.7) [1; 66]<br>584<br>50               | 10.8 (13.6) [1; 66]<br>270<br>25                    | 12.6 (9.6) [1; 35]<br>314<br>25                 |
| Chest               | 4.5 (3.6) [1; 14]<br>180<br>40                 | 3.5 (2.3) [1; 8]<br>70<br>20                        | 5.5 (4.4) [1; 14]<br>110<br>20                  |
| Head                | 5.9 (4.4) [1; 19]<br>277<br>47                 | 6.6 (4.7) [1; 19]<br>165<br>25                      | 5.1 (4.0) [1; 15]<br>112<br>22                  |
| Lower extremities   | 18.6 (14.4) [2; 73]<br>913<br>49               | 19.3 (16.2) [2; 73]<br>483<br>25                    | 17.9 (12.5) [2; 49]<br>430<br>24                |
| Upper extremities   | 13.1 (9.0) [1; 33]<br>656<br>50                | 14.4 (9.2) [3; 33]<br>359<br>25                     | 11.9 (8.8) [1; 32]<br>297<br>25                 |

<sup>a</sup> Mean per patient (SD) [Minimum; Maximum], N total MN, *N patients*

**Table SIII. Summary of linear mixed-effect on changes in MN aspects averaged for all localizations in relation to pregnancy, age and BMI**

|                                | Predictors | 29-30 weeks pregnant | 8-12 weeks postpartum |
|--------------------------------|------------|----------------------|-----------------------|
| Mean diameter                  | Estimate   | -0.91                | -1.16                 |
|                                | SE         | 0.31                 | 0.31                  |
|                                | 95% CI     | -1.53 to -0.29       | -1.78 to -0.54        |
|                                | t          | -2.95                | -3.74                 |
|                                | p          | 0.004                | <0.001                |
| Mean area                      | Estimate   | -0.04                | -0.29                 |
|                                | SE         | 0.06                 | 0.06                  |
|                                | 95% CI     | -0.16-0.09           | -0.42 to -0.16        |
|                                | t          | -0.55                | -4.59                 |
|                                | p          | 0.582                | <0.001                |
| Mean number of colours         | Estimate   | -0.02                | 0.13                  |
|                                | SE         | 0.05                 | 0.05                  |
|                                | 95% CI     | -0.12-0.07           | 0.03-0.22             |
|                                | t          | -0.52                | 2.71                  |
|                                | p          | 0.602                | 0.009                 |
| Mean number of dots & globules | Estimate   | 0.16                 | 0.06                  |
|                                | SE         | 0.2                  | 0.2                   |
|                                | 95% CI     | -0.24-0.56           | -0.34-0.46            |
|                                | t          | 0.8                  | 0.31                  |
|                                | p          | 0.429                | 0.757                 |
| Mean colour asymmetry          | Estimate   | 0                    | 0                     |
|                                | SE         | 0                    | 0                     |
|                                | 95% CI     | -0.01-0.01           | -0.00-0.01            |
|                                | t          | -0.28                | 0.95                  |
|                                | p          | 0.782                | 0.346                 |
| Mean shape asymmetry           | Estimate   | -0.01                | -0.03                 |
|                                | SE         | 0.01                 | 0.01                  |
|                                | 95% CI     | -0.04-0.01           | -0.06 to -0.01        |
|                                | t          | -1.27                | -2.92                 |
|                                | p          | 0.209                | 0.005                 |
| Mean ellipseness               | Estimate   | 0.04                 | 0.07                  |
|                                | SE         | 0.02                 | 0.02                  |
|                                | 95% CI     | -0.00-0.08           | 0.04-0.11             |
|                                | t          | 1.85                 | 4.38                  |
|                                | p          | 0.073                | <0.001                |
| Mean border sharpness          | Estimate   | -16.96               | -50.12                |
|                                | SE         | 17.74                | 17.74                 |
|                                | 95% CI     | -52.39-18.47         | -85.55 to -14.69      |
|                                | t          | -0.96                | -2.83                 |
|                                | p          | 0.343                | 0.006                 |
