# Supplementary material for: AI-assisted Total Body Dermoscopic Evaluation of Changes in Melanocytic Nevi during Pregnancy: A Prospective, Comparative Study of 2,799 Nevi
Source: PubMed Central journal article supplement — Acta Derm Venereol. 2025 Jan 3;105:41025. doi: 10.2340/actadv.v105.41025 (PMC11697141; doi:10.2340/actadv.v105.41025), 2025-01-03
Supplement: ActaDV-105-41025-s3.pdf [file ActaDV-105-41025-s3.pdf]

Supplementary material has been published as submitted. It has not been copyedited, or typeset by Acta Dermato-Venereologica

**Fig. S1.1. Scatter plot of a) diameter and b) area on the UE in relation to initial screening and follow-up at 17 to 21 weeks later in pregnant and non-pregnant women.** Open circles represent individual patient data, diamonds represent averages at a given examination session. Thin and solid lines connect data points across examination sessions.

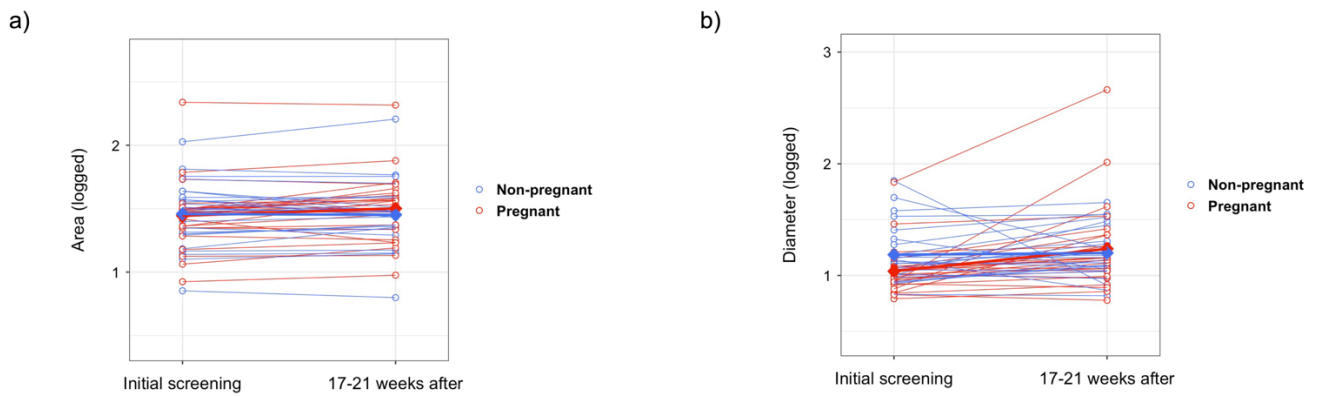

**Fig. S1.2. Scatter plot of area on the LE in relation to initial screening and follow-up at 17 to 21 weeks later in pregnant and non-pregnant women.** Open circles represent individual patient data, diamonds represent averages at a given examination session. Thin and solid lines connect data points across examination sessions.

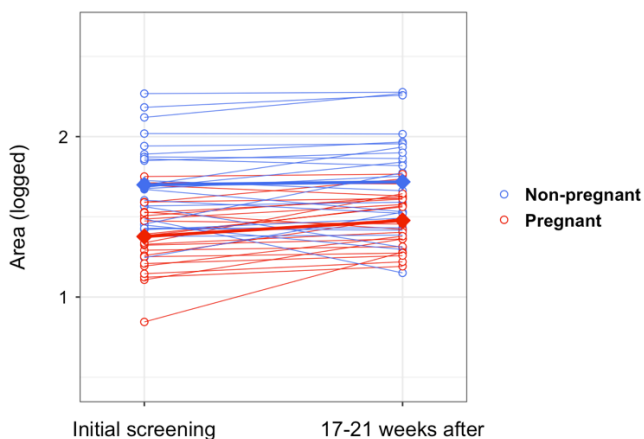

**SUPPLEMENTAL TABLE LEGENDS****Table SI. Additional data on patient characteristics of non-pregnant and pregnant women**

| <b>Characteristic</b> | <b>Overall,<br/>N = 50<sup>a</sup></b> | <b>Non-pregnant,<br/>N = 25<sup>a</sup></b> | <b>Pregnant,<br/>N = 25<sup>a</sup></b>                  |
|-----------------------|----------------------------------------|---------------------------------------------|----------------------------------------------------------|
| Previous other cancer |                                        |                                             |                                                          |
| No                    | 49 (100%)                              | 25 (100%)                                   | 24 (94%)                                                 |
| Yes                   | 0 (0%)                                 | 0 (0%)                                      | 1 (4%)                                                   |
| Previous pregnancy    |                                        |                                             |                                                          |
| No                    | 36 (72%)                               | 23 (92%)                                    | 13 (52%)                                                 |
| Yes                   | 14 (28%)                               | 2 (8.0%)                                    | 12 (48%)                                                 |
| Previous birth        |                                        |                                             |                                                          |
| No                    | 42 (84%)                               | 23 (92%)                                    | 19 (76%)                                                 |
| Yes                   | 8 (16%)                                | 2 (8.0%)                                    | 6 (24%)                                                  |
| Nicotine              |                                        |                                             |                                                          |
| No                    | 40 (80%)                               | 21 (84%)                                    | 19 (76%)                                                 |
| Yes                   | 10 (20%)                               | 4 (16%)                                     | 6 (24%)<br>(all 6 with<br>cessation during<br>pregnancy) |
| Alcohol consumption   |                                        |                                             |                                                          |
| Never                 | 4 (8.0%)                               | 2 (8.0%)                                    | 2 (8.0%)                                                 |
| Occasionally          | 46 (92%)                               | 23 (92%)                                    | 23 (92%)                                                 |
| Education             |                                        |                                             |                                                          |
